# Supplementary material
Source: ML conference proceedings conference paper supplement (https://openreview.net/forum?id=OiC78C68sJ)
Supplement: supplementary_material [file What are you sinking-Supplementary.pdf › What are you sinking-Supplementary.pdf]

The code implementation for this paper is available at:

<https://anonymous.4open.science/r/What-are-you-sinking--2B4D/README.md>

The repository contains all analysis notebooks, data samples, and instructions for reproducing our results.

Thank you :)
